# Supplementary material for: In Vitro Faecal Fermentation of Monomeric and Oligomeric Flavan‐3‐ols: Catabolic Pathways and Stoichiometry
Source: PubMed Central journal article supplement (PMC9786279; doi:10.1002/mnfr.202101090), 2022-02-18
Supplement: MNFR-66-2101090-s001.pdf [file MNFR-66-2101090-s001.pdf]

## Supporting information

### ***In vitro* faecal fermentation of monomeric and oligomeric flavan-3-ols: Catabolic pathways and stoichiometry**

Giuseppe Di Pede<sup>1</sup>, Letizia Bresciani<sup>1,\*</sup>, Furio Brighenti<sup>1</sup>, Michael N. Clifford<sup>2,3</sup>, Alan Crozier<sup>4,5</sup>, Daniele Del Rio<sup>1,6</sup>, Pedro Mena<sup>1,6</sup>.

- <sup>1</sup>Human Nutrition Unit, Department of Food and Drug, University of Parma, Parma, Italy
- <sup>2</sup> School of Bioscience and Medicine, University of Surrey, Guildford, United Kingdom
- <sup>3</sup>Department of Nutrition, Dietetics and Food, Monash University, Notting Hill, Victoria, Australia
- <sup>4</sup>Department of Chemistry, King Saud University, Riyadh, Saudi Arabia
- <sup>5</sup>School of Medicine, Dentistry and Nursing, University of Glasgow, United Kingdom
- <sup>6</sup> Microbiome Research Hub, University of Parma, Parma, Italy

\*Correspondence: Letizia Bresciani, Department of Food and Drugs, University of Parma; Medical School, Building C, Via Volturno, 39, 43125 Parma, Italy. [letizia.bresciani@unipr.it](mailto:letizia.bresciani@unipr.it)

**Table S1.** Limit of detection (LOD) and limit of quantification (LOQ) ( $\mu\text{mol L}^{-1}$ ) for reference standards used for the identification and quantification of gut microbiota catabolites. The nomenclature of gut microbiota catabolites was standardized according to Kay et al.<sup>[1]</sup>

| Compound                                               | LOD<br>( $\mu\text{mol L}^{-1}$ ) | LOQ<br>( $\mu\text{mol L}^{-1}$ ) |
|--------------------------------------------------------|-----------------------------------|-----------------------------------|
| (+)-Catechin                                           | 0.02                              | 0.05                              |
| (-)-Epicatechin                                        | 0.02                              | 0.05                              |
| Dimer A2                                               | 0.02                              | 0.05                              |
| Dimer B2                                               | 0.02                              | 0.05                              |
| Trimer AA                                              | 0.02                              | 0.05                              |
| Trimer AB                                              | 0.05                              | 0.25                              |
| Trimer BB                                              | 0.05                              | 0.25                              |
| Tetramer ABA                                           | 0.02                              | 0.05                              |
| Tetramer BBB                                           | 0.05                              | 0.25                              |
| Pentamer BBBB                                          | 0.05                              | 0.25                              |
| (-)-Epigallocatechin-3- <i>O</i> -gallate              | 0.05                              | 0.25                              |
| Theaflavin-3'- <i>O</i> -gallate                       | 0.25                              | 1.00                              |
| 5-(4'-Hydroxyphenyl)- $\gamma$ -valerolactone          | 0.06                              | 1.12                              |
| 5-(3'-Hydroxyphenyl)- $\gamma$ -valerolactone          | 0.01                              | 0.03                              |
| 5-(3',5'-Dihydroxyphenyl)- $\gamma$ -valerolactone     | 0.02                              | 0.06                              |
| 5-(3',4'-Dihydroxyphenyl)- $\gamma$ -valerolactone     | 0.02                              | 0.06                              |
| 5-(3',4',5'-Trihydroxyphenyl)- $\gamma$ -valerolactone | 0.30                              | 5.00                              |
| 5-(4'-Hydroxyphenyl)valeric acid                       | 0.25                              | 5.00                              |
| 3-Phenylpropanoic acid                                 | 0.25                              | 2.00                              |
| 3-(4'-Hydroxyphenyl)propanoic acid                     | 2.00                              | 5.00                              |
| 3-(3'-Hydroxyphenyl)propanoic acid                     | 2.00                              | 5.00                              |
| 3-(3',4'-Dihydroxyphenyl)propanoic acid                | 0.25                              | 2.00                              |
| Phenylacetic acid                                      | 0.05                              | 50.00                             |
| 4'-Hydroxyphenylacetic acid                            | 2.00                              | 5.00                              |
| 3'-Hydroxyphenylacetic acid                            | 10.00                             | 25.00                             |
| 3',4'-Dihydroxyphenylacetic acid                       | 0.05                              | 2.00                              |
| Benzoic acid                                           | 2.00                              | 5.00                              |
| 4-Hydroxybenzoic acid                                  | 0.25                              | 2.00                              |
| 3-Hydroxybenzoic acid                                  | 0.25                              | 2.00                              |
| 3,4-Dihydroxybenzoic acid                              | 0.05                              | 0.25                              |
| 3,4,5-Trihydroxybenzoic acid                           | 0.05                              | 0.25                              |
| 4-Hydroxybenzaldehyde                                  | 0.05                              | 0.25                              |
| Benzene-1,3,5-triol                                    | 0.25                              | 2.00                              |
| Benzene-1,2,3-triol                                    | 0.25                              | 2.00                              |
| 3,4-Dihydroxybenzaldehyde                              | 0.05                              | 0.25                              |

**Table S2.** Retention times and selective reaction monitoring (SRM) conditions for identification and quantification of monomeric and oligomeric flavan-3-ols and their gut microbiota catabolites by UHPLC-ESI-MS/MS. The nomenclature of gut microbiota catabolites was standardized according to Kay et al. <sup>[1]</sup>

| Compound (Abbreviation)                           | RT (min) | Parent ion (M - H) <sup>-</sup> (m/z) | S-lens | Quantifier        |        | Qualifier         |        | Standard used for quantification |
|---------------------------------------------------|----------|---------------------------------------|--------|-------------------|--------|-------------------|--------|----------------------------------|
|                                                   |          |                                       |        | Product ion (m/z) | CE (V) | Product ion (m/z) | CE (V) |                                  |
| <b>Parent compounds</b>                           |          |                                       |        |                   |        |                   |        |                                  |
| <b>Monomeric flavan-3-ols</b>                     |          |                                       |        |                   |        |                   |        |                                  |
| (+)-Catechin                                      | 3.65     | 289                                   | 112    | 245               | 18     | 203               | 23     | (+)-Catechin                     |
| (-)-Epicatechin                                   | 4.32     | 289                                   | 112    | 245               | 18     | 203               | 23     | (-)-Epicatechin                  |
| <b>Oligomeric flavan-3-ols</b>                    |          |                                       |        |                   |        |                   |        |                                  |
| <b>Dimers</b>                                     |          |                                       |        |                   |        |                   |        |                                  |
| Dimer A2                                          | 4.91     | 575                                   | 131    | 289               | 25     | 449               | 25     | Dimer A2                         |
| Dimer B2                                          | 4.22     | 577                                   | 131    | 289               | 27     | 407               | 25     | Dimer B2                         |
| <b>Trimers</b>                                    |          |                                       |        |                   |        |                   |        |                                  |
| Trimer AA                                         | 4.95     | 861                                   | 140    | 861               | 25     | -                 | -      | Trimer AA                        |
| Trimer AB                                         | 4.82     | 863                                   | 140    | 863               | 25     | 289               | 25     | Trimer AB                        |
| Trimer BB                                         | 4.50     | 865                                   | 140    | 865               | 25     | 289               | 25     | Trimer BB                        |
| <b>Tetramers</b>                                  |          |                                       |        |                   |        |                   |        |                                  |
| Tetramer ABA                                      | 5.05     | 574*                                  | 145    | 289               | 25     | 574               | 25     | Tetramer ABA                     |
| Tetramer BBB                                      | 4.59     | 576*                                  | 145    | 289               | 22     | 125               | 42     | Tetramer BBB                     |
| <b>Pentamer</b>                                   |          |                                       |        |                   |        |                   |        |                                  |
| Pentamer BBBB                                     | 4.68     | 720.6*                                | 204    | 289               | 34     | 125               | 45     | Pentamer BBBB                    |
| <b>Galloyl derivatives</b>                        |          |                                       |        |                   |        |                   |        |                                  |
| <b>Monomer</b>                                    |          |                                       |        |                   |        |                   |        |                                  |
| (-)-Epigallocatechin-3- <i>O</i> -gallate (EGCG)  | 4.42     | 457                                   | 86     | 169               | 21     | 125               | 44     | EGCG                             |
| <b>Dimer</b>                                      |          |                                       |        |                   |        |                   |        |                                  |
| Theaflavin-3'- <i>O</i> -gallate                  | 5.60     | 715                                   | 98     | 563               | 30     | 715               | 30     | Theaflavin-3'- <i>O</i> -gallate |
| <b>Fission catabolites</b>                        |          |                                       |        |                   |        |                   |        |                                  |
| <b>Dimers</b>                                     |          |                                       |        |                   |        |                   |        |                                  |
| <i>Derived from catabolic pathway of dimer A2</i> |          |                                       |        |                   |        |                   |        |                                  |
| 1 Fission Dimer A2, form 1                        | 5.18     | 577                                   | 131    | 577               | 25     | 291               | 25     | Dimer A2                         |

|                                                       |      |      |     |     |    |     |    |              |
|-------------------------------------------------------|------|------|-----|-----|----|-----|----|--------------|
| 2 Fission Dimer A2, form 1                            | -    | 579  | -   | -   | -  | -   | -  | n.d.         |
| <i>Derived from catabolic pathway of dimer B2</i>     |      |      |     |     |    |     |    |              |
| 1 Fission Dimer B2, form 1                            | 4.89 | 579  | 131 | 291 | 25 | 289 | 25 | Dimer B2     |
| 2 Fission Dimer B2, form 1                            | 5.53 | 581  | 131 | 581 | 25 | 291 | 25 | Dimer B2     |
| <b>Trimers</b>                                        |      |      |     |     |    |     |    |              |
| <i>Derived from catabolic pathway of trimer AA</i>    |      |      |     |     |    |     |    |              |
| 1 Fission Trimer AA, form 1                           | 5.06 | 863  | 140 | 863 | 25 | -   | -  | Trimer AA    |
| 1 Fission Trimer AA, form 2                           | 5.32 | 863  | 140 | 863 | 25 | -   | -  | Trimer AA    |
| 2 Fission Trimer AA, form 1                           | -    | 865  | -   | -   | -  | -   | -  | n.d.         |
| 3 Fission Trimer AA, form 1                           | -    | 867  | -   | -   | -  | -   | -  | n.d.         |
| <i>Derived from catabolic pathway of trimer AB</i>    |      |      |     |     |    |     |    |              |
| 1 Fission Trimer AB, form 1                           | 5.07 | 865  | 140 | 865 | 25 | 291 | 25 | Trimer AB    |
| 1 Fission Trimer AB, form 2                           | 5.17 | 865  | 140 | 865 | 25 | 291 | 25 | Trimer AB    |
| 2 Fission Trimer AB, form 1                           | -    | 867  | -   | -   | -  | -   | -  | n.d.         |
| 3 Fission Trimer AB, form 1                           | -    | 869  | -   | -   | -  | -   | -  | n.d.         |
| <i>Derived from catabolic pathway of trimer BB</i>    |      |      |     |     |    |     |    |              |
| 1 Fission Trimer BB, form 1                           | 4.71 | 867  | 140 | 867 | 25 | 291 | 25 | Trimer BB    |
| 2 Fission Trimer BB, form 1                           | 4.86 | 869  | 140 | 869 | 25 | -   | -  | Trimer BB    |
| 3 Fission Trimer BB, form 1                           | -    | 871  | -   | -   | -  | -   | -  | n.d.         |
| <b>Tetramers</b>                                      |      |      |     |     |    |     |    |              |
| <i>Derived from catabolic pathway of tetramer ABA</i> |      |      |     |     |    |     |    |              |
| 1 Fission Tetramer ABA, form 1                        | -    | 576* | -   | -   | -  | -   | -  | n.d.         |
| 2 Fission Tetramer ABA, form 1                        | -    | 578* | -   | -   | -  | -   | -  | n.d.         |
| 3 Fission Tetramer ABA, form 1                        | -    | 580* | -   | -   | -  | -   | -  | n.d.         |
| 4 Fission Tetramer ABA, form 1                        | -    | 582* | -   | -   | -  | -   | -  | n.d.         |
| <i>Derived from catabolic pathway of tetramer BBB</i> |      |      |     |     |    |     |    |              |
| 1 Fission Tetramer BBB, form 1                        | 4.80 | 578* | 145 | 291 | 25 | 578 | 25 | Tetramer BBB |
| 1 Fission Tetramer BBB, form 2                        | 5.60 | 578* | 145 | 578 | 25 | 289 | 25 | Tetramer BBB |
| 1 Fission Tetramer BBB, form 3                        | 6.21 | 578* | 145 | 578 | 25 | -   | -  | Tetramer BBB |
| 2 Fission Tetramer BBB, form 1                        | 5.54 | 580* | 145 | 580 | 25 | 291 | 25 | Tetramer BBB |
| 3 Fission Tetramer BBB, form 1                        | 4.63 | 582* | 145 | 291 | 25 | 289 | 25 | Tetramer BBB |
| 4 Fission Tetramer BBB, form 1                        | 5.23 | 584* | 145 | 584 | 25 | -   | -  | Tetramer BBB |
| <b>Pentamers</b>                                      |      |      |     |     |    |     |    |              |

*Derived from catabolic pathway of pentamer BBBB*

|                            |   |        |   |   |   |   |   |      |
|----------------------------|---|--------|---|---|---|---|---|------|
| 1 Fission Pentamer, form 1 | - | 722.6* | - | - | - | - | - | n.d. |
| 2 Fission Pentamer, form 1 | - | 724.6* | - | - | - | - | - | n.d. |
| 3 Fission Pentamer, form 1 | - | 726.6* | - | - | - | - | - | n.d. |
| 4 Fission Pentamer, form 1 | - | 728.8* | - | - | - | - | - | n.d. |
| 5 Fission Pentamer, form 1 | - | 730.6* | - | - | - | - | - | n.d. |

**Theaflavin-3'-O-gallate derivatives**

*Derived from catabolic pathway of theaflavin*

|                              |   |     |   |   |   |   |   |      |
|------------------------------|---|-----|---|---|---|---|---|------|
| 1 Fission Theaflavin, form 1 | - | 565 | - | - | - | - | - | n.d. |
| 2 Fission Theaflavin, form 1 | - | 567 | - | - | - | - | - | n.d. |

*Derived from catabolic pathway of theaflavin-3'-O-gallate*

|                                   |   |     |   |   |   |   |   |      |
|-----------------------------------|---|-----|---|---|---|---|---|------|
| 1 Fission Theaflavin-3'-O-gallate | - | 717 | - | - | - | - | - | n.d. |
| 2 Fission Theaflavin-3'-O-gallate | - | 719 | - | - | - | - | - | n.d. |

**Diphenylpropan-2-ol derivatives**

|                                                                                                 |      |     |    |     |    |     |    |                |
|-------------------------------------------------------------------------------------------------|------|-----|----|-----|----|-----|----|----------------|
| 1-(Hydroxyphenyl)-3-(2'',4'',6''-trihydroxyphenyl)-propan-2-ol                                  | 4.84 | 275 | 98 | 231 | 16 | 191 | 30 | 3',4'-diOH-PVL |
| 1-(3',5'-Dihydroxyphenyl)-3-(2'',4'',6''-trihydroxyphenyl)-propan-2-ol                          | 4.16 | 291 | 98 | 123 | 30 | 167 | 30 | 3',5'-diOH-PVL |
| 1-(3',4'-Dihydroxyphenyl)-3-(2'',4'',6''-trihydroxyphenyl)-propan-2-ol                          | 4.36 | 291 | 98 | 123 | 30 | 247 | 16 | 3',4'-diOH-PVL |
| 1-(3',4',5'-Trihydroxyphenyl)-3-(2'',4'',6''-trihydroxyphenyl)-propan-2-ol                      | -    | 307 | -  | -   | -  | -   | -  | n.d.           |
| 1-(3',4',5'-Trihydroxyphenyl)-3-(2'',4'',6''-trihydroxyphenyl) propan-2-yl gallate <sup>5</sup> | -    | 459 | -  | -   | -  | -   | -  | n.d.           |

**Phenyl-γ-valerolactones**

|                                                            |      |     |    |     |    |     |    |                |
|------------------------------------------------------------|------|-----|----|-----|----|-----|----|----------------|
| 5-Phenyl-γ-valerolactone                                   | -    | 175 | -  | -   | -  | -   | -  | n.d.           |
| 5-(4'-Hydroxyphenyl)-γ-valerolactone                       | 4.92 | 191 | 67 | 147 | 16 | 106 | 31 | n.q.           |
| 5-(3'-Hydroxyphenyl)-γ-valerolactone (3'-OH-PVL)           | 5.07 | 191 | 67 | 147 | 16 | 106 | 31 | 3'-OH-PVL      |
| 5-(3',5'-Dihydroxyphenyl)-γ-valerolactone (3',5'-diOH-PVL) | 3.98 | 207 | 81 | 163 | 18 | 123 | 20 | 3',5'-diOH-PVL |
| 5-(3',4'-Dihydroxyphenyl)-γ-valerolactone (3',4'-diOH-PVL) | 4.33 | 207 | 81 | 163 | 18 | 122 | 21 | 3',4'-diOH-PVL |
| 5-(3',4',5'-Trihydroxyphenyl)-γ-valerolactone              | 2.55 | 223 | 75 | 179 | 21 | 138 | 26 | n.d.           |

**Phenylvaleric acids**

|                                                 |      |     |    |     |    |     |    |                |
|-------------------------------------------------|------|-----|----|-----|----|-----|----|----------------|
| 5-Phenylvaleric acid                            | -    | 177 | -  | -   | -  | -   | -  | n.d.           |
| 5-(4'-Hydroxyphenyl)valeric acid                | 5.46 | 193 | 71 | 147 | 30 | 175 | 30 | n.d.           |
| 5-(3'-Hydroxyphenyl)valeric acid                | 5.56 | 193 | 71 | 147 | 30 | 175 | 30 | 3'-OH-PVL      |
| 4-Hydroxy-5-(phenyl)valeric acid                | -    | 193 | -  | -   | -  | -   | -  | n.d.           |
| 4-Hydroxy-5-(hydroxyphenyl)valeric acid         | 4.38 | 209 | 63 | 147 | 20 | 101 | 20 | 3',4'-diOH-PVL |
| 5-(3',5'-Dihydroxyphenyl)valeric acid           | 4.75 | 209 | 63 | 191 | 15 | 147 | 20 | 3',5'-diOH-PVL |
| 5-(3',4'-Dihydroxyphenyl)valeric acid           | 5.02 | 209 | 63 | 191 | 15 | 165 | 12 | 3',4'-diOH-PVL |
| 4-Hydroxy-5-(3',5'-Dihydroxyphenyl)valeric acid | -    | 225 | -  | -   | -  | -   | -  | n.d.           |

|                                                         |      |     |    |     |    |     |    |               |
|---------------------------------------------------------|------|-----|----|-----|----|-----|----|---------------|
| 4-Hydroxy-5-(3',4'-Dihydroxyphenyl)valeric              | -    | 225 | -  | -   | -  | -   | -  | n.d.          |
| 5-(3',4',5'-Trihydroxyphenyl)valeric acid               | -    | 225 | -  | -   | -  | -   | -  | n.d.          |
| 4-Hydroxy-5-(3',4',5'-Trihydroxyphenyl)valeric acid     | -    | 241 | -  | -   | -  | -   | -  | n.d.          |
| <b>Phenylbutyric acids</b>                              |      |     |    |     |    |     |    |               |
| 4-Phenylbutyric acid                                    | -    | 163 | -  | -   | -  | -   | -  | n.d.          |
| 4-(4'-Hydroxyphenyl)butyric acid                        | -    | 179 | -  | -   | -  | -   | -  | n.d.          |
| 4-(3'-Hydroxyphenyl)butyric acid                        | -    | 179 | -  | -   | -  | -   | -  | n.d.          |
| 4-(3',4'-Dihydroxyphenyl)butyric acid                   | -    | 195 | -  | -   | -  | -   | -  | n.d.          |
| 4-(3',5'-Dihydroxyphenyl)butyric acid                   | -    | 195 | -  | -   | -  | -   | -  | n.d.          |
| 4-(3',4',5'-Trihydroxyphenyl)butyric acid               | -    | 211 | -  | -   | -  | -   | -  | n.d.          |
| <b>Phenylpropanoic acid derivatives</b>                 |      |     |    |     |    |     |    |               |
| 3-Phenylpropanoic acid                                  | 5.64 | 149 | 60 | 149 | 10 | 105 | 13 | n.d.          |
| 3-(4'-Hydroxyphenyl)propanoic acid                      | 4.37 | 165 | 64 | 121 | 13 | 93  | 14 | n.d.          |
| 3-(3'-Hydroxyphenyl)propanoic acid (3'-OHPPA)           | 4.65 | 165 | 64 | 121 | 13 | 119 | 18 | 3'-OHPPA      |
| 2-Hydroxy-3-(phenyl)propanoic acid                      | -    | 165 | -  | -   | -  | -   | -  | n.d.          |
| 3-(3',5'-Dihydroxyphenyl)propanoic acid                 | 2.58 | 181 | 64 | 137 | 14 | -   | -  | 3',4'-diOHPPA |
| 3-(3',4'-Dihydroxyphenyl)propanoic acid (3',4'-diOHPPA) | 3.27 | 181 | 64 | 137 | 14 | 109 | 18 | n.d.          |
| 2-Hydroxy-3-(hydroxyphenyl)propanoic acid               | -    | 181 | -  | -   | -  | -   | -  | n.d.          |
| 3-(4'-Hydroxy-3'-methoxyphenyl)propanoic acid           | -    | 195 | -  | -   | -  | -   | -  | n.d.          |
| 3-(3',4',5'-Trihydroxyphenyl)propanoic acid             | -    | 197 | -  | -   | -  | -   | -  | n.d.          |
| <b>Phenylacetic acid derivatives</b>                    |      |     |    |     |    |     |    |               |
| Phenylacetic acid                                       | 5.04 | 135 | 40 | 91  | 10 | 135 | 10 | n.d.          |
| 4'-Hydroxyphenylacetic acid                             | 3.14 | 151 | 75 | 107 | 13 | -   | -  | n.d.          |
| 3'-Hydroxyphenylacetic acid                             | 3.79 | 151 | 75 | 107 | 13 | -   | -  | n.d.          |
| 3',4'-Dihydroxyphenylacetic acid                        | 1.85 | 167 | 35 | 123 | 13 | 122 | 28 | n.d.          |
| 3',4',5'-Trihydroxyphenylacetic acid                    | -    | 183 | -  | -   | -  | -   | -  | n.d.          |
| <b>Benzoic acid derivatives</b>                         |      |     |    |     |    |     |    |               |
| Benzoic acid                                            | 4.98 | 121 | 68 | 77  | 13 | 121 | 10 | n.d.          |
| 4-Hydroxybenzoic acid                                   | 2.73 | 137 | 72 | 93  | 16 | -   | -  | n.d.          |
| 3-Hydroxybenzoic acid                                   | 3.62 | 137 | 72 | 93  | 16 | -   | -  | n.d.          |
| 3,4-Dihydroxybenzoic acid                               | 1.62 | 153 | 74 | 109 | 16 | 108 | 26 | n.d.          |
| 3,5-Dihydroxybenzoic acid                               | -    | 153 | -  | -   | -  | -   | -  | n.d.          |
| 3,4,5-Trihydroxybenzoic acid (3,4,5-triOHBA)            | 0.96 | 169 | 78 | 125 | 17 | 79  | 25 | 3,4,5-triOHBA |
| <b>Benzene derivatives</b>                              |      |     |    |     |    |     |    |               |
| Benzene-1,2-diol                                        | -    | 109 | -  | -   | -  | -   | -  | n.d.          |

|                                      |      |     |    |     |    |     |    |                                  |
|--------------------------------------|------|-----|----|-----|----|-----|----|----------------------------------|
| 4-Hydroxybenzaldehyde                | 3.70 | 121 | 68 | 92  | 26 | 120 | 20 | n.d.                             |
| Hydroxybenzyl alcohol                | -    | 123 | -  | -   | -  | -   | -  | n.d.                             |
| Benzene-1,3,5-triol                  | 0.88 | 125 | 62 | 125 | 10 | 57  | 17 | n.d.                             |
| Benzene-1,2,3-triol                  | 1.06 | 125 | 62 | 125 | 10 | 79  | 22 | benzene-1,2,3-triol              |
| 3,4-Dihydroxybenzaldehyde            | 2.34 | 137 | 72 | 136 | 22 | 108 | 26 | n.d.                             |
| 2,4,6-Trihydroxybenzaldehyde         | -    | 153 | -  | -   | -  | -   | -  | n.d.                             |
| <b>Monomer units</b>                 |      |     |    |     |    |     |    |                                  |
| (-)-Epigallocatechin                 | -    | 305 | -  | -   | -  | -   | -  | n.d.                             |
| (-)-Epicatechin-3- <i>O</i> -gallate | -    | 441 | -  | -   | -  | -   | -  | n.d.                             |
| <b>Dimer units</b>                   |      |     |    |     |    |     |    |                                  |
| Theanaphthoquinone <sup>#</sup>      | -    | 533 | -  | -   | -  | -   | -  | n.d.                             |
| Theaflavin                           | 5.45 | 563 | 98 | 241 | 30 | 269 | 30 | Theaflavin-3'- <i>O</i> -gallate |

RT = retention time;  $m/z$  = mass to charge ratio; CE = collision energy; n.d. = not detected; n.q. = not quantified because below the LOQ. <sup>§</sup>catabolite previously quantified after faecal fermentation of EGCG<sup>[2]</sup>; <sup>~</sup>catabolite previously quantified after faecal fermentation of EGCG<sup>[3]</sup>; <sup>#</sup>catabolite previously quantified after faecal fermentation of theaflavin-3,3'-digallate<sup>[2]</sup>. \* Compounds were monitored as [M-2H]<sup>2-</sup>.

**Table S3.** Stoichiometric balances in the production of total 5C-RFMs (PVLs and PVAs) from each parent compound fermented *in vitro*.

| Compound                         | 24 h MMR for total 5C-RFMs * (%) | Quantity of parent compound to achieve 1 $\mu$ mol of total 5C-RFMs ( $\mu$ mol) | 24 h MMR for total 5C-RFMs § (%) | Quantity of parent compound to achieve 1 $\mu$ mol of total 5C-RFMs after complete breakdown of each monomeric subunit ( $\mu$ mol) |
|----------------------------------|----------------------------------|----------------------------------------------------------------------------------|----------------------------------|-------------------------------------------------------------------------------------------------------------------------------------|
| <b>Monomeric flavan-3-ols</b>    |                                  |                                                                                  |                                  |                                                                                                                                     |
| (+)-Catechin                     | 29.0                             | 3.5                                                                              | 29.0                             | 3.5                                                                                                                                 |
| (-)-Epicatechin                  | 40.2                             | 2.5                                                                              | 40.2                             | 2.5                                                                                                                                 |
| <b>Oligomeric flavan-3-ols</b>   |                                  |                                                                                  |                                  |                                                                                                                                     |
| <b>Dimers</b>                    |                                  |                                                                                  |                                  |                                                                                                                                     |
| Dimer A2                         | 0.3                              | 295.3                                                                            | 0.2                              | 590.5                                                                                                                               |
| Dimer B2                         | 13.7                             | 7.3                                                                              | 6.9                              | 14.5                                                                                                                                |
| <b>Trimers</b>                   |                                  |                                                                                  |                                  |                                                                                                                                     |
| Trimer AA                        | 0.0                              | 0.0                                                                              | 0.0                              | 0.0                                                                                                                                 |
| Trimer AB                        | 0.0                              | 0.0                                                                              | 0.0                              | 0.0                                                                                                                                 |
| Trimer BB                        | 6.2                              | 16.2                                                                             | 2.1                              | 48.7                                                                                                                                |
| <b>Tetramers</b>                 |                                  |                                                                                  |                                  |                                                                                                                                     |
| Tetramer ABA                     | 0.0                              | 0.0                                                                              | 0.0                              | 0.0                                                                                                                                 |
| Tetramer BBB                     | 5.2                              | 19.2                                                                             | 1.3                              | 76.8                                                                                                                                |
| <b>Pentamer</b>                  |                                  |                                                                                  |                                  |                                                                                                                                     |
| Pentamer BBBB                    | 5.0                              | 20.0                                                                             | 1.0                              | 99.8                                                                                                                                |
| <b>Galloyl derivatives</b>       |                                  |                                                                                  |                                  |                                                                                                                                     |
| <b>Monomer</b>                   |                                  |                                                                                  |                                  |                                                                                                                                     |
| (-)-Epigallocatechin-3-O-gallate | 6.6                              | 15.2                                                                             | 6.6                              | 15.2                                                                                                                                |
| <b>Dimer</b>                     |                                  |                                                                                  |                                  |                                                                                                                                     |
| Theaflavin-3'-O-gallate          | 0.0                              | 0.0                                                                              | 0.0                              | 0.0                                                                                                                                 |

MMR: molar mass recovery;

\*MMR calculated assuming the production of 5C-RFMs from 1  $\mu$ mol of incubated parent compound;

§MMR calculated assuming the production of 5C-RFMs from 1  $\mu$ mol of all the possible monomeric unit released from the oligomeric structure in accordance with the DP (2-5) of parent compound.



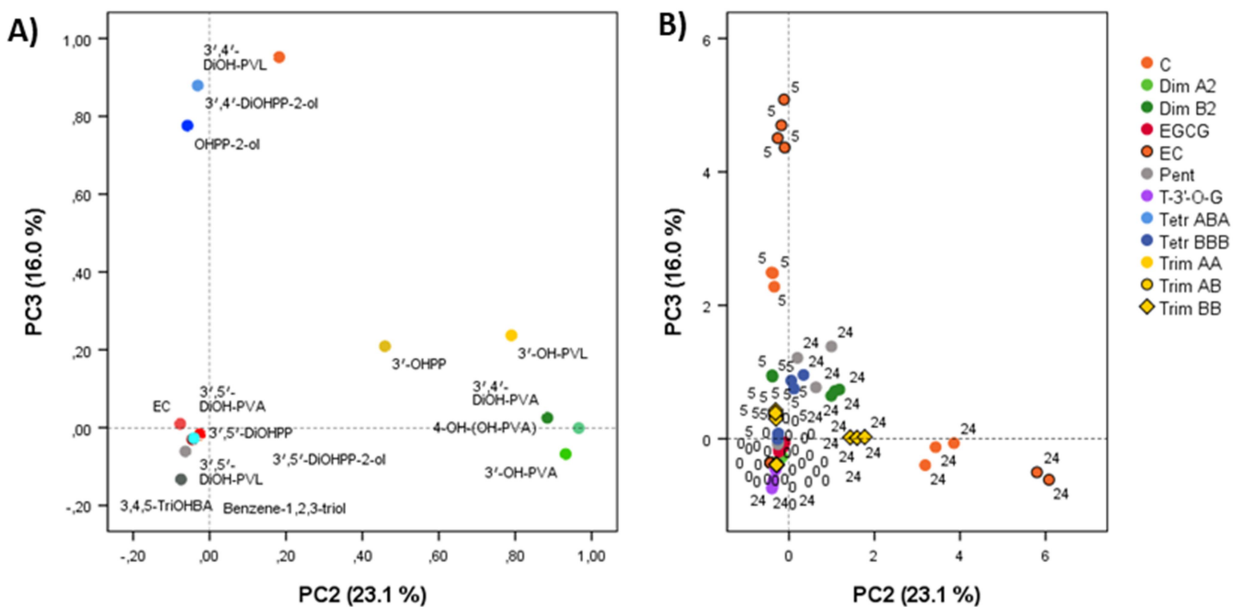

**Figure S1.** Principal component analysis (PCA) to explore differences in the behavior of parent compounds in the *in vitro* colonic environment and in the appearance of gut microbiota catabolites over the faecal fermentation of monomeric and oligomeric flavan-3-ols. Loading plots of PC2 versus PC3 (A). Score plots of the concentrations of identified gut microbiota catabolites obtained from PC2 and PC3 (B). The number accounts for the collection time (0 h, 5 h and 24 h). C: (+)-catechin; EC: (-)-epicatechin; Dim: dimer; Trim: trimer; Tetr: tetramer; Pent: pentamer; EGCG: (-)-epigallocatechin-3-*O*-gallate; T-3'-*O*-G: theaflavin-3'-*O*-gallate. OHPP-2-ol: 1-(hydroxyphenyl)-3-(2'',4'',6''-trihydroxyphenyl)-propan-2-ol; 3',5'-DiOHPP-2-ol: 1-(3',5'-dihydroxyphenyl)-3-(2'',4'',6''-trihydroxyphenyl)-propan-2-ol; 3',4'-DiOHPP-2-ol: 1-(3',4'-dihydroxyphenyl)-3-(2'',4'',6''-trihydroxyphenyl)-propan-2-ol; 3'-OH-PVL: 5-(3'-hydroxyphenyl)- $\gamma$ -valerolactone; 3',5'-DiOH-PVL: 5-(3',5'-dihydroxyphenyl)- $\gamma$ -valerolactone; 3',4'-DiOH-PVL: 5-(3',4'-dihydroxyphenyl)- $\gamma$ -valerolactone; 3'-OH-PVA: 5-(3'-hydroxyphenyl)valeric acid; 4-OH-(OH-PVA): 4-hydroxy-5-(hydroxyphenyl)valeric acid; 3',5'-DiOH-PVA: 5-(3',5'-dihydroxyphenyl)valeric acid; 3',4'-DiOH-PVA: 5-(3',4'-dihydroxyphenyl)valeric acid; 3'-OHPP: 3-(3'-hydroxyphenyl)propanoic acid; 3',5'-DiOHPP: 3-(3',5'-dihydroxyphenyl)propanoic acid; 3,4,5-TriOHBA: 3,4,5-trihydroxybenzoic acid. Too specific compounds as fission catabolites from oligomers were not included.

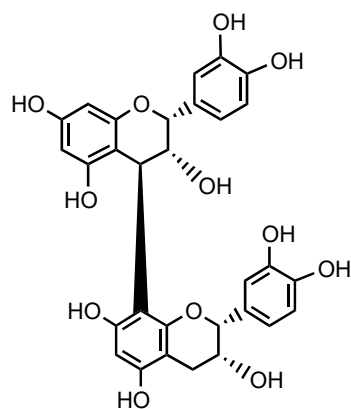

Procyanidin B<sub>2</sub> dimer

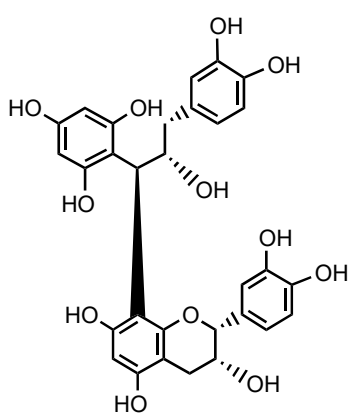

Fission upper unit

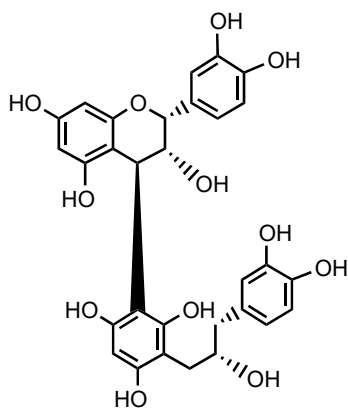

Fission lower unit

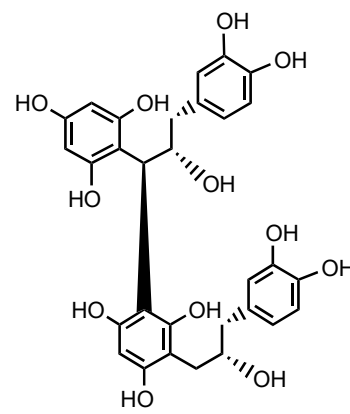

Fission both units

Figure S2. Fission derivatives of dimer B2

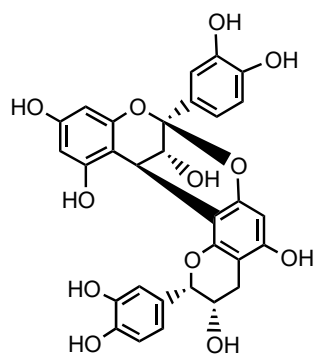

Procyanidin A<sub>2</sub> dimer

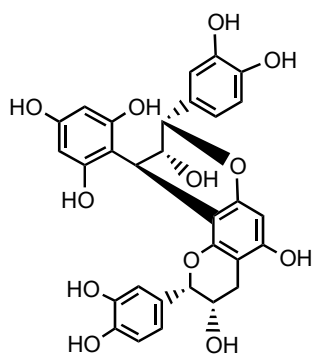

Fission upper unit

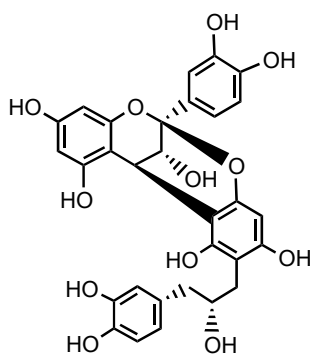

Fission lower unit

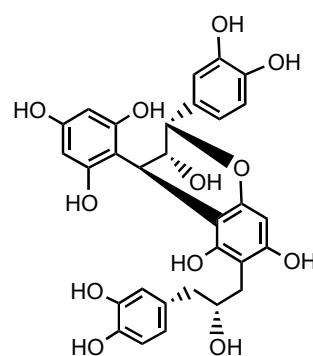

Fission both units

Figure S3. Fission derivatives of dimer A2

## References

- [1] C. D. Kay, M. N. Clifford, P. Mena, G. J. McDougall, C. Andres-Lacueva, A. Cassidy, D. Del Rio, N. Kuhnert, C. Manach, G. Pereira-Caro, A. Rodriguez-Mateos, A. Scalbert, F. Tomás-Barberán, G. Williamson, D. S. Wishart, A. Crozier, *Am. J. Clin. Nutr.* **2020**, *112*, 1051–1068.
- [2] Z. Liu, W. J. C. de Bruijn, M. E. Bruins, J.-P. Vincken, *J. Agric. Food Chem.* **2020**, *69*, 232–245.
- [3] Z. Liu, W. J. C. de Bruijn, M. E. Bruins, J.-P. Vincken, *J. Agric. Food Chem.* **2020**, *68*, 9804–9815.
